# Supplementary material for: A triptycene-cored perylenediimide derivative and its application in organic solar cells as a non-fullerene acceptor
Source: Royal Society of Chemistry journal article supplement (doi:10.1039/c7nj01971h), 2017-01-01
Supplement: c7nj01971h1.pdf [file c7nj01971h1.pdf]

**Electronic Supplement Information for**

**A triptycene-cored perylenediimide derivative and its**

**application in organic solar cells as a non-fullerene acceptor**

Li-Peng Zhang,<sup>a</sup> Wenchao Zhao,<sup>bc</sup> Xiaoyu Liu,<sup>bc</sup> Ke-Jian Jiang,<sup>\*a</sup> Feng-Ting Li,<sup>ac</sup> Jianhui Hou,<sup>\*b</sup> and Lian-Ming Yang<sup>\*a</sup>

<sup>a</sup> Key Laboratory of Green Printing, Beijing National Laboratory for Molecular Sciences, Institute of Chemistry, Chinese Academy of Sciences, Beijing, 100190, P. R. China. E-mail: [kjjiang@iccas.ac.cn](mailto:kjjiang@iccas.ac.cn), [yanglm@iccas.ac.cn](mailto:yanglm@iccas.ac.cn)

<sup>b</sup> State Key Laboratory of Polymer Physics and Chemistry, Beijing National Laboratory for Molecular Sciences, Institute of Chemistry, Chinese Academy of Sciences, Beijing, 100190, P. R. China. E-mail: [hjhzlz@iccas.ac.cn](mailto:hjhzlz@iccas.ac.cn)

<sup>c</sup> University of Chinese Academy of Sciences, Beijing, 100049, P. R. China

## Materials

All of solvents were purified according to standard methods. All reagents were commercially obtained from Alfa Aesar Chemical Co. and J&K Chemical Co. and used without further purification unless otherwise specified. All manipulations involving air-sensitive reagents were performed in an atmosphere of dry argon. 2,6(7),14-Tribromo-triptycene (**TRIP-3Br**) was synthesized according to the reference procedure.<sup>1</sup>

## Measurements and characterization

NMR spectra were recorded on a BRUKER AVANCE 400 MHz instrument. The residual solvent protons (<sup>1</sup>H) or the solvent carbons (<sup>13</sup>C) were used as internal standards. <sup>1</sup>H NMR data are presented as follows: the chemical shift in ppm ( $\delta$ ) downfield from tetramethylsilane (multiplicity, coupling constant (Hz), integration). The following abbreviations are used in the NMR data reported: s, singlet; d, doublet; t, triplet; q, quartet; and m, multiplet. UV-vis absorption spectra were recorded on a Shimadzu UV-1800 spectrophotometer. Mass spectra were taken on a Bruker Daltonics Inc. spectrometer. Cyclic voltammetry measurements were carried out on a Shanghai Chenhua CHI660C electrochemical workstation. The thermal properties were tested on a Netzsch TG209 F3 thermogravimetric analyzer and a TA Q2000 DSC analyzer. The active layer film thickness data were obtained *via* the surface profilometer (Bruker Dektak XT). The photoactive area of 4.15 mm<sup>2</sup> was achieved using a shadow mask. The *J-V* test were conducted using a Class AAA solar simulator (SAN-EI) affording a value of 100 mW cm<sup>-2</sup>. The EQE data were obtained using an IPCE measurement system (QE-R3011, Enli Technology Co. Ltd., Taiwan).

## Synthesis

**2,6(7),14-Tris(4,4,5,5-tetramethyl-1,3,2-dioxaborolan-2-yl)-triptycene (TRIP-3B).**  
A mixture of 2,6(7),14-tribromo- triptycene (**TRIP-3Br**)<sup>2</sup> (420 mg, 0.86 mmol), bis(pinacolato)diboron (740 mg, 2.91mmol), PdCl<sub>2</sub>(dppf)<sub>2</sub> (32 mg, 0.043 mmol),

KOAc (420 mg, 4.28 mmol) and dry toluene (20 mL) was refluxed for 15 h under a nitrogen atmosphere. After removal of the solvent, the residue was dissolved in ethyl acetate (100 mL). Then the organic phase was washed with brine (50 mL), and dried over anhydrous  $\text{MgSO}_4$ . After removal of the solvent, the residue was purified by silica gel column chromatography (eluting with dichloromethane) to afford the product **TRIP-3B** (341 mg, 63%) as a white solid.  $^1\text{H}$  NMR ( $\text{CDCl}_3$ , 400 MHz):  $\delta$  1.29 (s, 36H), 5.45 (d, 2H), 7.34–7.37 (m, 3H), 7.45 (dd, 3H), 7.80 (d, 3H);  $^{13}\text{C}$  NMR ( $\text{CDCl}_3$ , 100 MHz):  $\delta$  24.7, 24.8, 25.0, 54.1, 54.4, 83.6, 83.6, 123.1, 123.2, 129.5, 129.6, 129.6, 132.2, 132.3, 132.5, 143.8, 144.1, 144.5, 147.7, 148.1, 148.4. HR-MS (MALDI):  $m/z$   $[\text{M}]^+$  calcd for  $\text{C}_{38}\text{H}_{47}\text{B}_3\text{O}_6$ , 632.3652; found, 632.3613.

**TRIP-PDI<sub>3</sub>**. A mixture of **TRIP-3B** (95 mg, 0.15 mmol), PDI-Br (499 mg, 0.60 mmol),  $\text{Pd}(\text{PPh}_3)_4$  (30 mg),  $\text{K}_2\text{CO}_3$  (138 mg, 1.0 mmol) was dissolved in the mixed toluene (25 mL) and  $\text{H}_2\text{O}$  (3 mL), and then refluxed for 20 h under a nitrogen atmosphere. After removal of the solvent, the residue was dissolved in dichloromethane (200 mL), and the organic phase was washed with brine (50 mL) and dried over anhydrous  $\text{MgSO}_4$ . After removal of the solvent, the residue was purified by silica gel column chromatography (eluting with dichloromethane/petroleum ether 15/50, v/v) to afford the product **TRIP-PDI<sub>3</sub>** (169 mg, 45%) as a red solid.  $^1\text{H}$  NMR ( $\text{CDCl}_3$ , 400 MHz):  $\delta$  0.81–0.86 (m, 36H), 1.25–1.41 (m, 86H), 1.59 (s, 13 H), 1.70–1.87 (m, 10H), 2.20–2.27 (m, 12H), 5.23 (t, 6H), 5.60–5.73 (m, 2H), 7.05–8.09 (m, 18H), 8.53–8.70 (m, 12H);  $^{13}\text{C}$  NMR ( $\text{CDCl}_3$ , 100 MHz):  $\delta$  165.02, 163.96, 147.54, 145.48, 141.69, 140.05, 137.08, 135.05, 134.70, 132.83, 131.63, 130.55, 130.14, 129.39, 128.76, 128.42, 127.75, 126.44, 125.88, 125.08, 123.76, 123.27, 122.84, 54.96, 54.78, 53.85, 32.61, 31.97, 29.93, 29.42, 27.44, 27.09, 22.79, 14.24. HR-MS (MALDI):  $m/z$   $[\text{M}+1]^+$  calcd for  $\text{C}_{170}\text{H}_{194}\text{N}_6\text{O}_{12}$ , 2512.4788; found, 2534.4747  $[\text{M}+\text{Na}]^+$ .

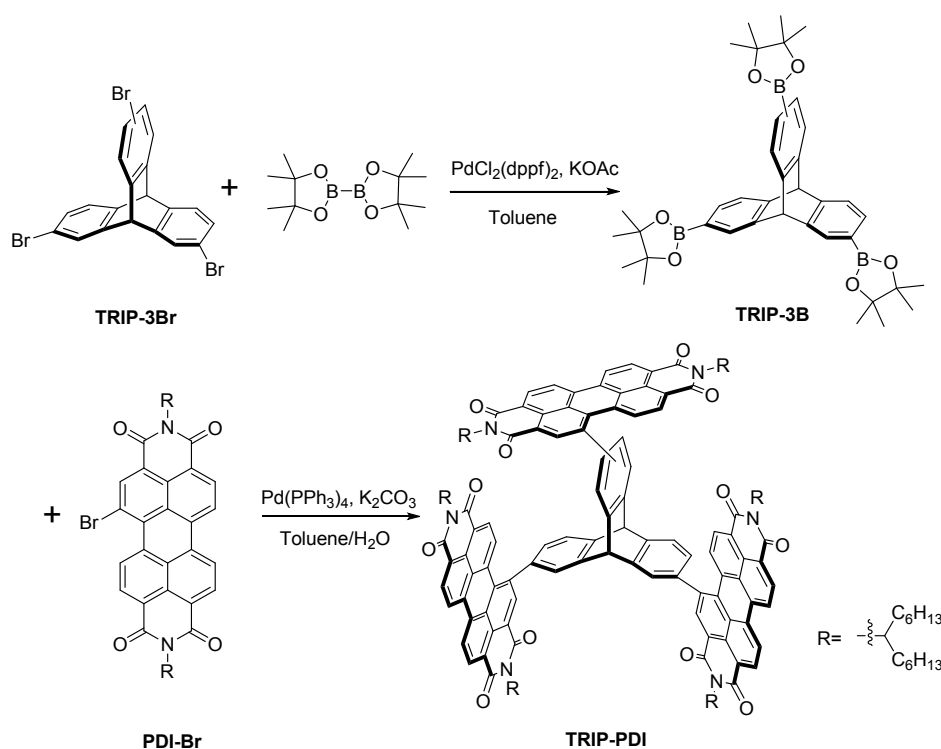

**Scheme S1** Synthetic route to **TRIP-PDI<sub>3</sub>**

NMR spectra of **TRIP-3B** and **TRIP-PDI<sub>3</sub>**

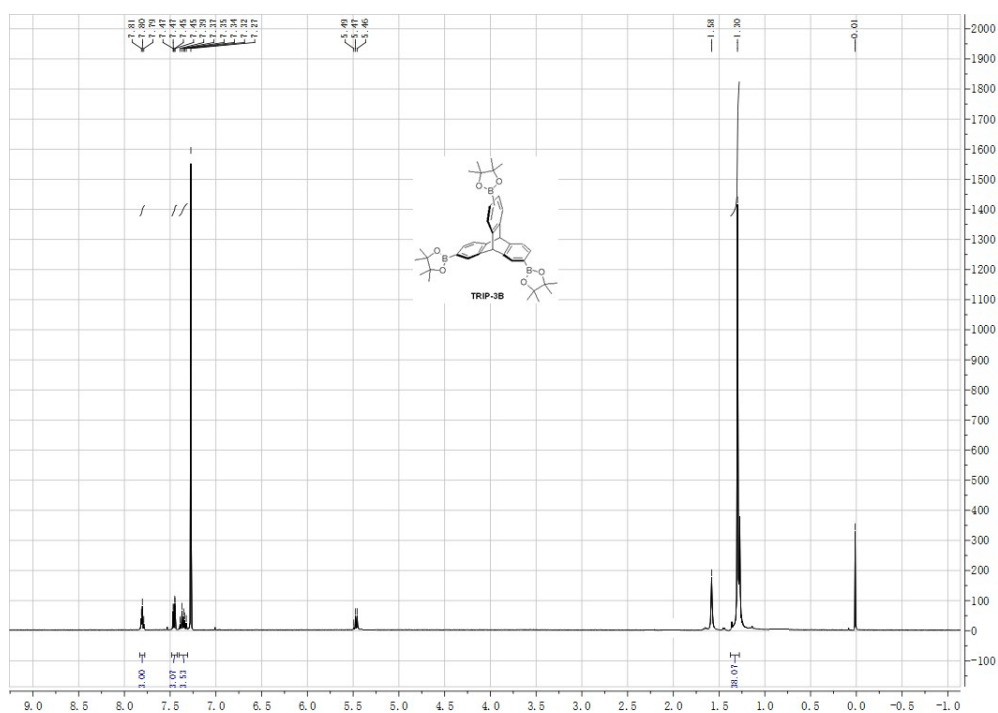

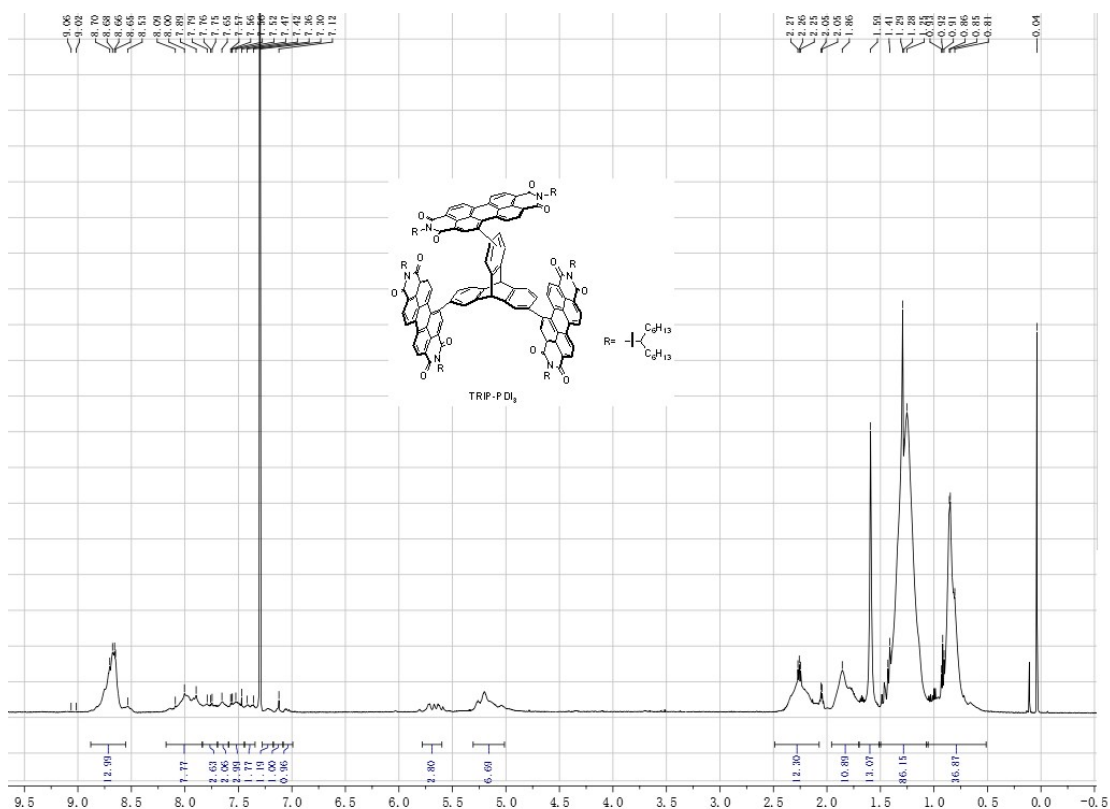

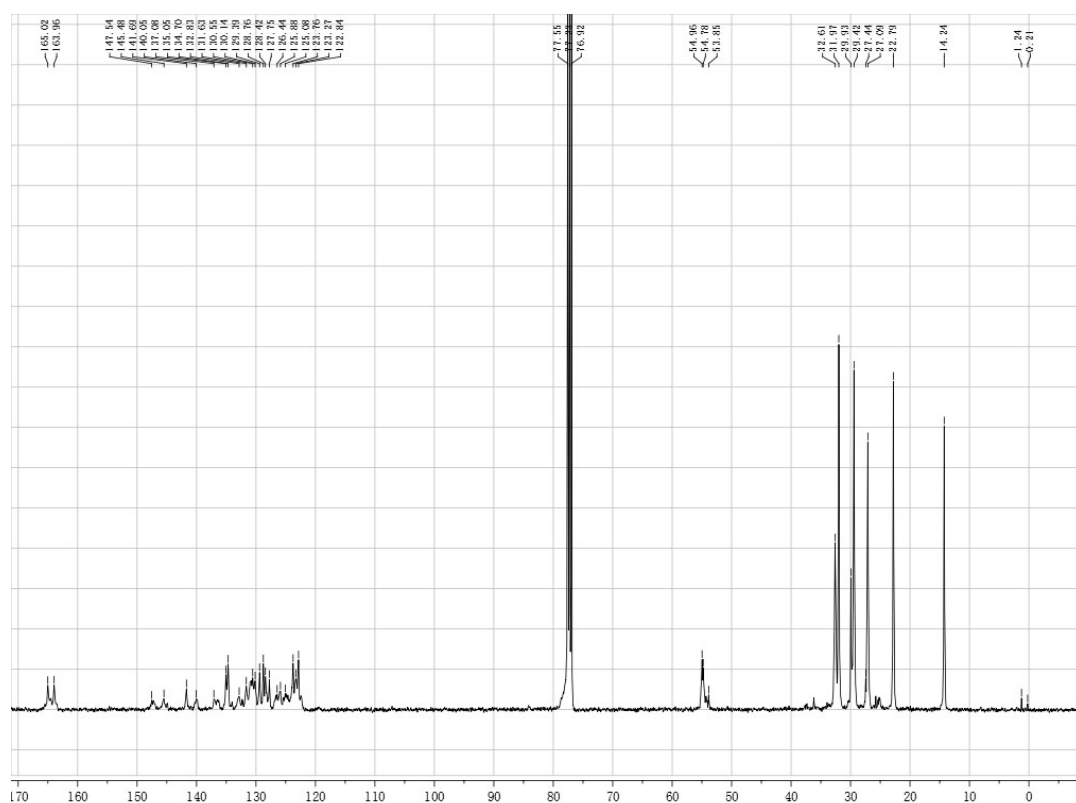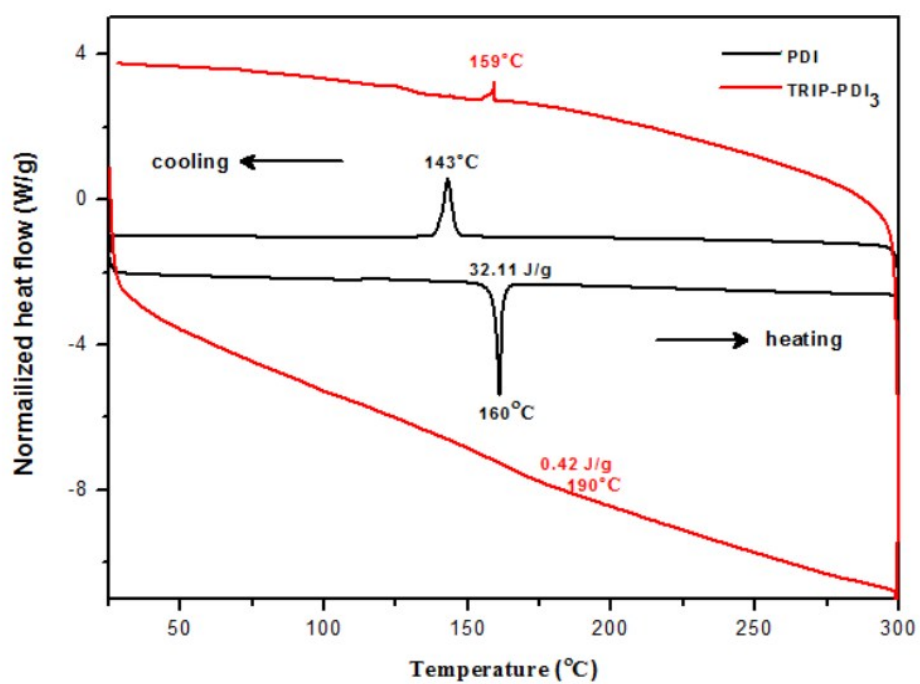

**Figure S1** DSC curves of TRIP-PDI<sub>3</sub> under N<sub>2</sub> atmosphere

## SCLC measurements

The hole and electron mobility data was extracted from the dark  $J$ - $V$  characteristics

of hole-only devices, ITO/PEDOT:PSS/**PBDT-TS1:TRIP-PDI<sub>3</sub>**/Au, and electron only devices ITO/ZnO/**PBDT-TS1:TRIP-PDI<sub>3</sub>**/Al devices. The electrical characteristics were measured with a source/measure unit (Keithley 4200) in a N<sub>2</sub>-filled glove box. The dark  $J$ - $V$  curves were fitted by using the Mott-Gurney equation (eq. 1), where  $J$  is the dark current density,  $\epsilon_0$  is the vacuum permittivity,  $\epsilon$  is the static dielectric constant of the medium,  $\mu_0$  is the zero-field mobility,  $\gamma$  is the disorder parameter,  $V$  is the effective voltage and  $L$  is the film thickness. For the case of hole-only devices the built in voltage ( $V_{bi}$ ) value of 0V and for electron only devices  $V_{bi} = 1.5$  V was used.<sup>2</sup>

$$J(V) = \frac{9}{8} \epsilon_0 \epsilon_r \mu_0 \exp(0.89\gamma\sqrt{V/L}) \frac{V^2}{L^3} \dots\dots\dots (1)$$

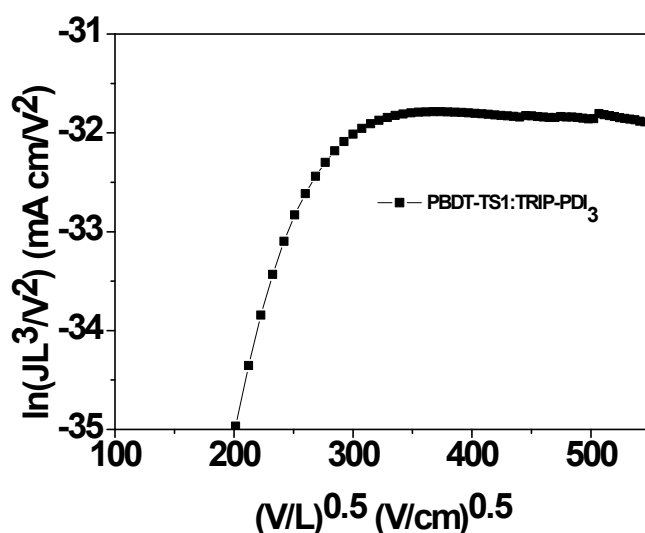

**Fig. S2**  $J_{0.5}$ - $V$  curves of the electron-only devices based on **PBDT-TS1:TRIP-PDI<sub>3</sub>** films.

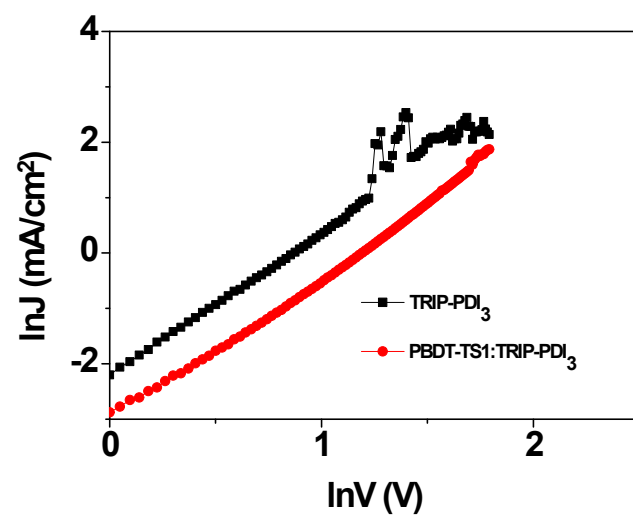

**Fig. S3**  $J_{0.5}$ - $V$  curves of the electron-only devices based on **PBDT-TS1:TRIP-PDI<sub>3</sub>** films and **TRIP-PDI<sub>3</sub>**

**Table S1.** The detailed photovoltaic performances of the solar cells based on **PBDT-TS1** and **TRIP-PDI<sub>3</sub>**

| D/A<br>(w/w)         | Spin-coating<br>(rpm) | $J_{sc}$<br>(mA cm <sup>-2</sup> ) <sup>b</sup> | $V_{oc}$ (V) | FF   | PCE (%)           | Aver. PCE<br>(±Std. dev.) (%) <sup>c</sup> | Thickness<br>(nm) <sup>d</sup> |
|----------------------|-----------------------|-------------------------------------------------|--------------|------|-------------------|--------------------------------------------|--------------------------------|
| 1.5 : 1 <sup>a</sup> | 1000                  | 10.27                                           | 0.96         | 0.35 | 3.45              | ---                                        | 110                            |
|                      | 1500                  | 9.19                                            | 0.96         | 0.41 | 3.61              | 3.53(±0.112)                               | 73                             |
|                      | 2000                  | 8.52                                            | 0.96         | 0.41 | 3.35              | ---                                        | 56                             |
| 1 : 1 <sup>a</sup>   | 1000                  | 10.68                                           | 0.98         | 0.37 | 3.87              | ---                                        | 120                            |
|                      | 1500                  | 9.77                                            | 0.98         | 0.43 | 4.11 <sup>e</sup> | 3.98(±0.102)                               | 74                             |
|                      | 2000                  | 8.62                                            | 0.98         | 0.46 | 3.89              | ---                                        | 63                             |
| 1 : 1                | 1500                  | 10.26                                           | 0.96         | 0.46 | 4.53              | 4.41(±0.095) <sup>f</sup>                  | 85                             |
|                      | 1500                  | 11.43                                           | 0.95         | 0.40 | 4.34 <sup>g</sup> | ---                                        | 85                             |
|                      | 1500                  | 10.83                                           | 0.96         | 0.42 | 4.37 <sup>h</sup> | ---                                        | 85                             |
|                      | 1500                  | 10.43                                           | 0.97         | 0.40 | 4.05 <sup>i</sup> | 3.89(±0.102)                               | 87                             |
|                      | 1500                  | 10.22                                           | 0.96         | 0.41 | 4.02 <sup>j</sup> | 3.92(±0.10)                                | 84                             |
|                      | 1500                  | 11.17                                           | 0.97         | 0.40 | 4.33 <sup>k</sup> | 4.22(±0.10)                                | 86                             |
| 1 : 1.5 <sup>a</sup> | 1000                  | 7.11                                            | 0.97         | 0.31 | 2.14              | ---                                        | 188                            |
|                      | 1500                  | 10.33                                           | 0.98         | 0.38 | 3.85              | 3.68(±0.114)                               | 122                            |
|                      | 2000                  | 9.89                                            | 0.97         | 0.36 | 3.45              | ---                                        | 110                            |

<sup>a</sup> As-cast. <sup>b</sup> Calculated by convoluting the spectral response with the AM 1.5G spectrum (100mW cm<sup>-2</sup>). <sup>c</sup> Average values from 6 pieces of devices. <sup>d</sup> The thickness data were obtained *via* the surface profilometer (Bruker Dektak XT). <sup>e</sup> Without additive. <sup>f</sup> With 0.5% 1,8-diiodooctane (DIO). <sup>g</sup> With 1.0% DIO. <sup>h</sup> With 1.5% DIO. <sup>i</sup> With 0.5% 1-chloronaphthalene CN. <sup>j</sup> With 0.5% *N*-methyl pyrrolidone (NMP). <sup>k</sup> With 0.5% diphenyl ether( DPE).

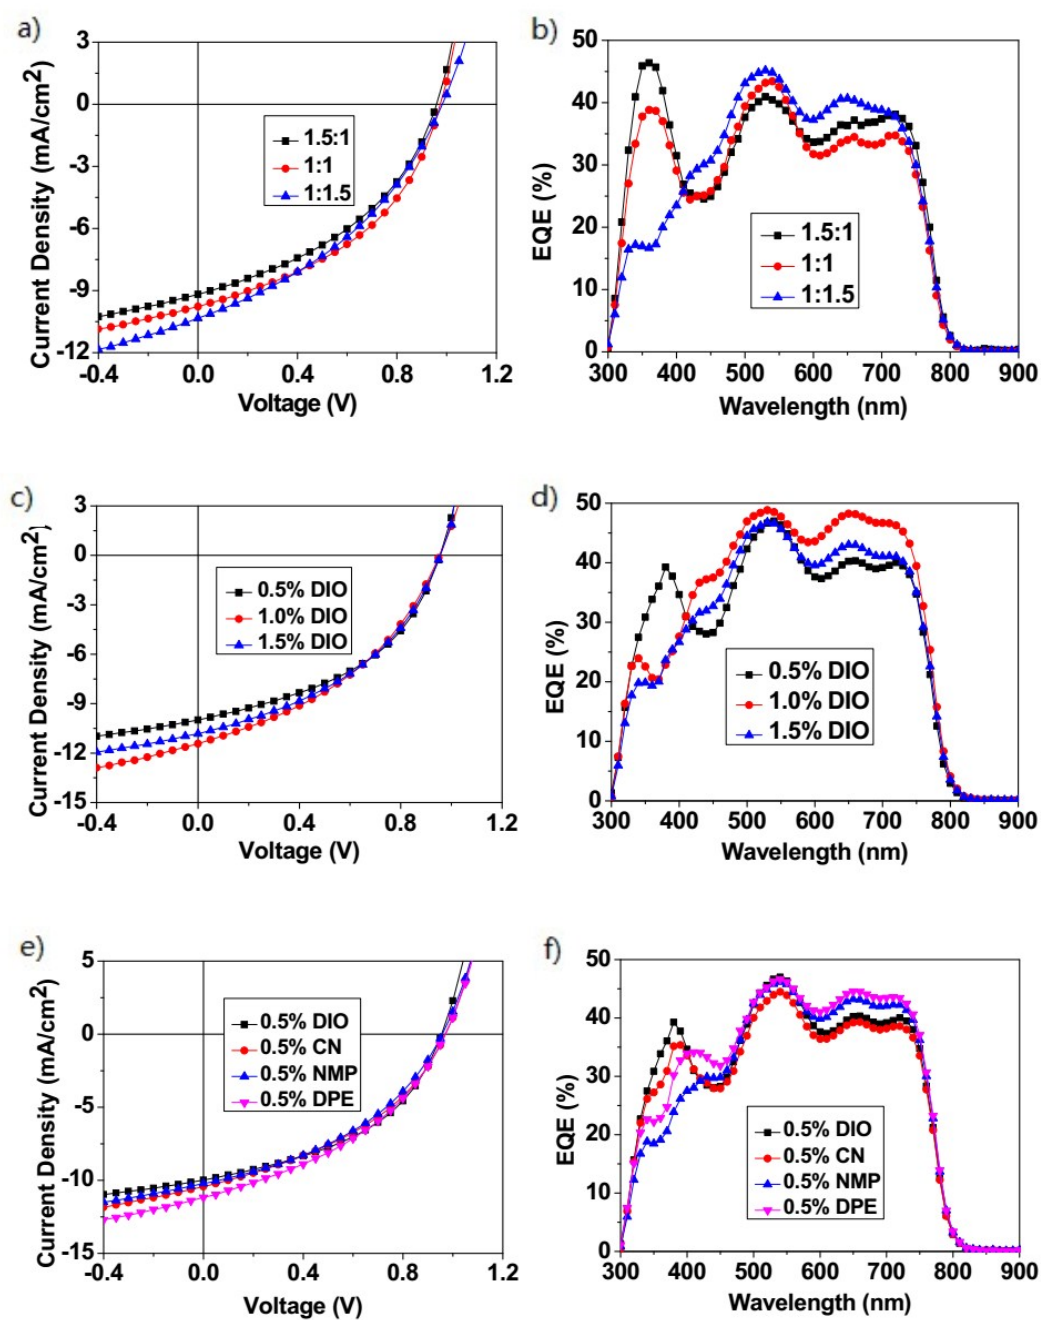

**Fig. S4**  $J-V$  curves of OSCs based on **PBDT-TS1** and **TRIP-PDI<sub>3</sub>** : a) with different D/A ratios, c) with different amount of additive and e) with different additives; EQE spectra of **PBDT-TS1:TRIP-PDI<sub>3</sub>** based OSCs: d) with different D/A ratios, d) with different amount of additive and f) with different additives.

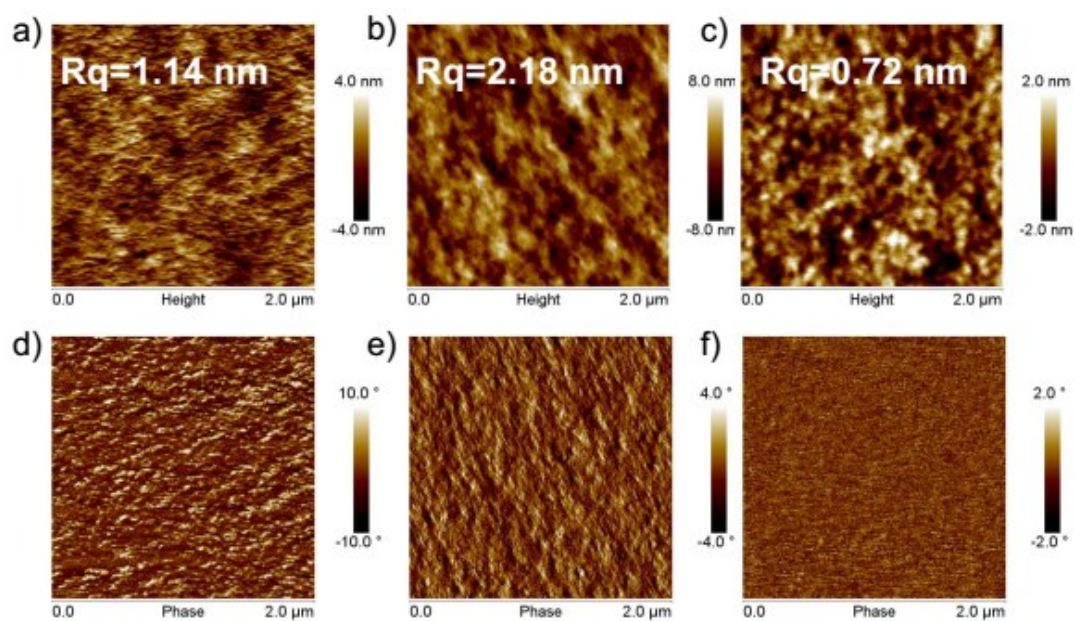

**Fig. S5** Morphology images of the D/A blend film: a), b) and c) are the AFM height images, a) with 0.5% CN, b) with 0.5% NMP, c) with 0.5% DPE; d), e) and f) are the AFM phase images, d) with 0.5% CN, e) with 0.5% NMP, f) with 0.5% DPE.

## References

1. C. Zhang and C. F. Chen, *J. Org. Chem.*, 2006, **71**, 6626.
2. T. Ye, R. Singh, H. -J. Butt, G. Floudas, and P. E. Keivanidis, *ACS Appl. Mater. Interfaces*, 2013, **5**, 11844.
